# Supplementary material
Source: PubMed Central journal article supplement (PMC4015231)
Supplement: mt201425x1.pdf [file mt201425x1.pdf]

**Table S1. Primers for Recombinant constructs vectors**

| Name                            | Specific sequence                               | Amplicon size (bp) |
|---------------------------------|-------------------------------------------------|--------------------|
| TGF- $\beta$ 1-Exon3-F          | CTAGGCTAGCTATAGCAACAATTCCTGGCG                  | 88                 |
| TGF- $\beta$ 1-Exon3-R          | AGCTAAGCTTAGCCACTCAGGCGTATCAGTGGGGGTCA          |                    |
| TGF- $\beta$ 1-Exon3-mutation-R | AGCTAAGCTT <u>ACGGAGT</u> GAGGCGTATCAGTGGGGGTCA |                    |

Note: the mutation sites were emphasized by underline.

**Table S2. Over-expression of miR29b improves cardiac function at day 14 after AngII infusion**

|             | Saline D14   | AngII D14       |                 |               |
|-------------|--------------|-----------------|-----------------|---------------|
|             |              | AngII           | Vector          | miR-29b       |
| IVS;d(mm)   | 0.63±0.07    | 1.01±0.14***    | 1.00±0.11***    | 0.83±0.16*#   |
| LVID;d(mm)  | 3.83±0.52    | 3.33±0.52*      | 3.81±0.25       | 3.80±0.31     |
| LVPW;d(mm)  | 0.81±0.08    | 0.85±0.33*      | 0.89±0.10*      | 0.88±0.09     |
| IVS;s(mm)   | 1.06±0.07    | 1.40±0.15***    | 1.46±0.19***    | 1.25±0.10***# |
| LVID;s(mm)  | 2.43±0.38    | 2.15±0.30       | 2.23±0.28       | 2.49±0.30     |
| LVPW;s(mm)  | 1.08±0.17    | 1.19±0.21       | 1.27±0.15*      | 1.12±0.06#    |
| EF(%)       | 65.91±1.80   | 58.78±2.02***   | 58.44±2.71***   | 61.98±3.42*#  |
| FS(%)       | 35.08±4.64   | 32.40±3.71      | 31.84±3.60      | 35.74±2.25#   |
| LV Mass(mg) | 100.58±11.30 | 126.34±16.82*** | 128.60±10.05*** | 118.07±9.07*# |

IVS;d= Diastolic interventricular septal wall thickness; LVID;d= Diastolic left ventricular diameter; LVPW;d= Diastolic left ventricular posterior wall thickness; IVS;s= Systolic interventricular septal wall thickness; LVID;s= Systolic left ventricular diameter; LVPW;s= Systolic left ventricular posterior wall thickness; EF=Ejection fraction; FS=Shortening fraction.

\*  $P < 0.05$ ; \*\*  $P < 0.01$ ; \*\*\*  $P < 0.001$  when compared with saline.

#  $P < 0.05$ ; ##  $P < 0.01$ ; ###  $P < 0.001$  when compared with Vector control.

**Table S3. The restored miR-29b improves cardiac function in established hypertensive cardiopathy**

|                    | Saline D28   | AngII D14       | AngII D28       |               |                  |
|--------------------|--------------|-----------------|-----------------|---------------|------------------|
|                    |              |                 | AngII           | Vector        | miR-29b          |
| <b>IVS;d(mm)</b>   | 0.62±0.05    | 1.02±0.15***    | 1.25±0.17***    | 1.15±0.12***  | 0.91±0.11***###  |
| <b>LVID;d(mm)</b>  | 3.78±0.25    | 3.31±0.50*      | 3.22±0.39***    | 3.25±0.46*    | 3.36±0.32*       |
| <b>LVPW;d(mm)</b>  | 0.86±0.09    | 0.89±0.36       | 0.99±0.06***    | 1.03±0.28     | 1.02±0.25        |
| <b>IVS;s(mm)</b>   | 0.98±0.10    | 1.38±0.12***    | 1.59±0.10***    | 1.52±0.13***  | 1.31±0.19***#    |
| <b>LVID;s(mm)</b>  | 2.40±0.40    | 2.19±0.40       | 2.05±0.31       | 2.07±0.27     | 2.30±0.16        |
| <b>LVPW;s(mm)</b>  | 1.07±0.11    | 1.24±0.16*      | 1.44±0.14***    | 1.46±0.20***  | 1.28±0.17*       |
| <b>EF(%)</b>       | 66.71±6.11   | 57.02±1.78***   | 42.24±3.05***   | 41.41±0.40*** | 58.76±4.90***### |
| <b>FS(%)</b>       | 36.51±4.71   | 32.09±2.97*     | 30.55±3.42*     | 31.72±1.09*   | 34.67±4.16       |
| <b>LV Mass(mg)</b> | 102.04±11.98 | 128.65±17.26*** | 133.58±10.79*** | 130.96±9.83** | 120.39±8.82***#  |

Abbreviation seen Table S2.

\*  $P < 0.05$ ; \*\*  $P < 0.01$ ; \*\*\*  $P < 0.001$  when compared with saline control.

#  $P < 0.05$ ; ##  $P < 0.01$ ; ###  $P < 0.001$  when compared with empty vector control.

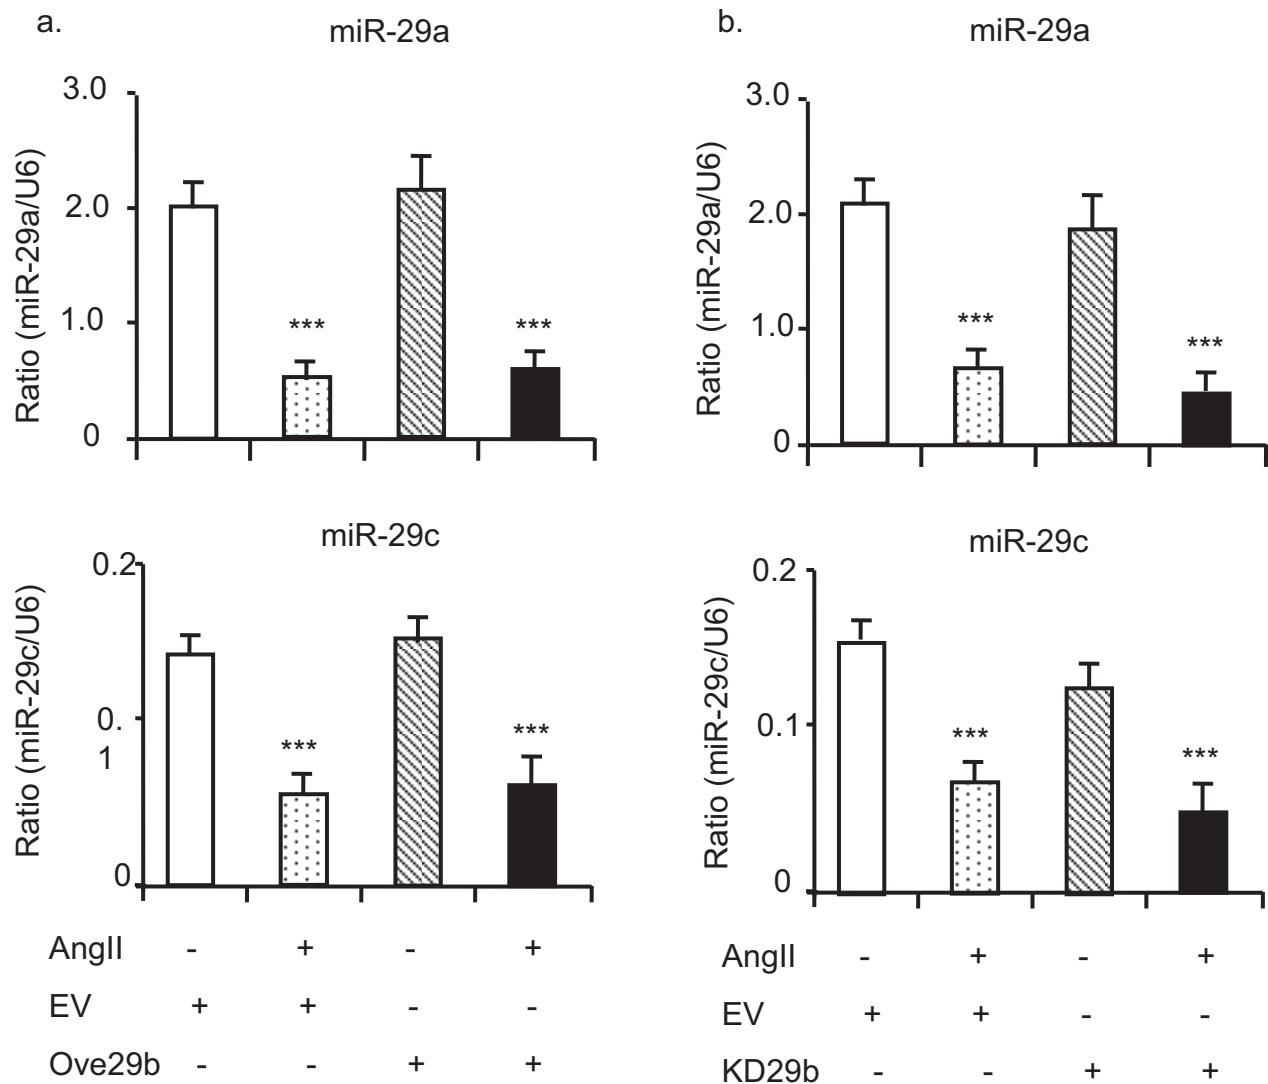

**Figure S1. Effect of AngII and overexpression or knockdown of pre-miR-29b on miR-29a and miR-29c expression by cardiac fibroblasts. (CFs)** (a) Effect of overexpressing pre-miR-29b on AngII (1  $\mu\text{mol/L}$ )-induced downregulation of miR-29a and miR-29c by CFs. (b) Effect of knocking down pre-miR-29b on AngII (1  $\mu\text{mol/L}$ )-induced downregulation of miR-29a and miR-29c by CFs. Results show that addition of AngII downregulates miR-29a and miR-29c in CFs, which is not altered by overexpressing (Ove29b) or knocking down (KD29b) pre-miR-29b. Each bar represents mean  $\pm$  SEM for 4 independent experiments. \*\*\*  $P < 0.001$  when compared with the empty vector (EV) group.

**a. Systolic blood pressure**

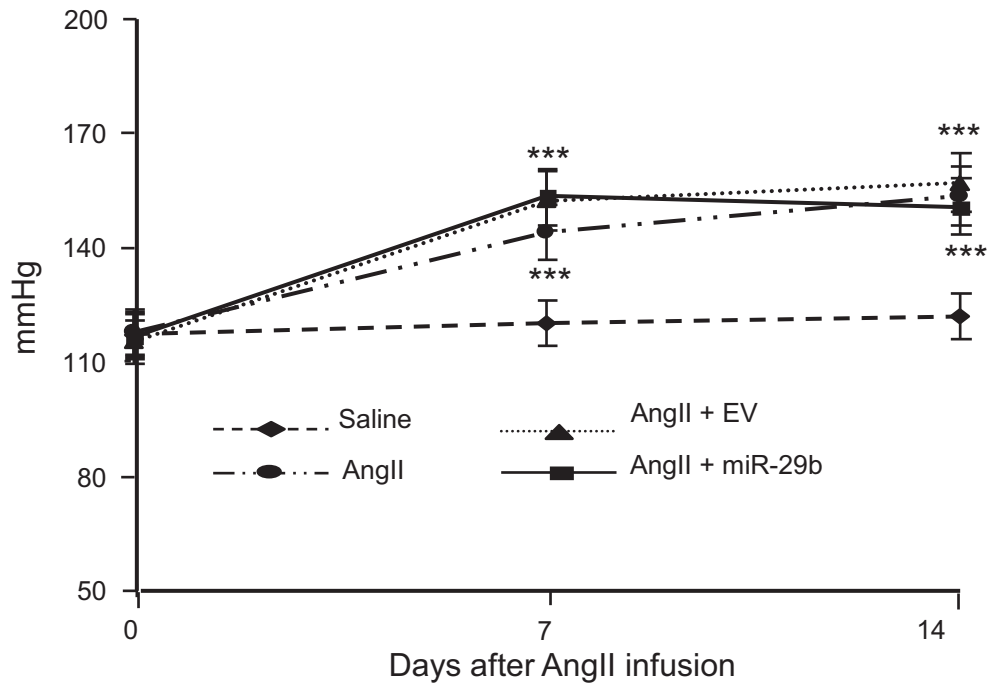

**b. Masson's trichrome**

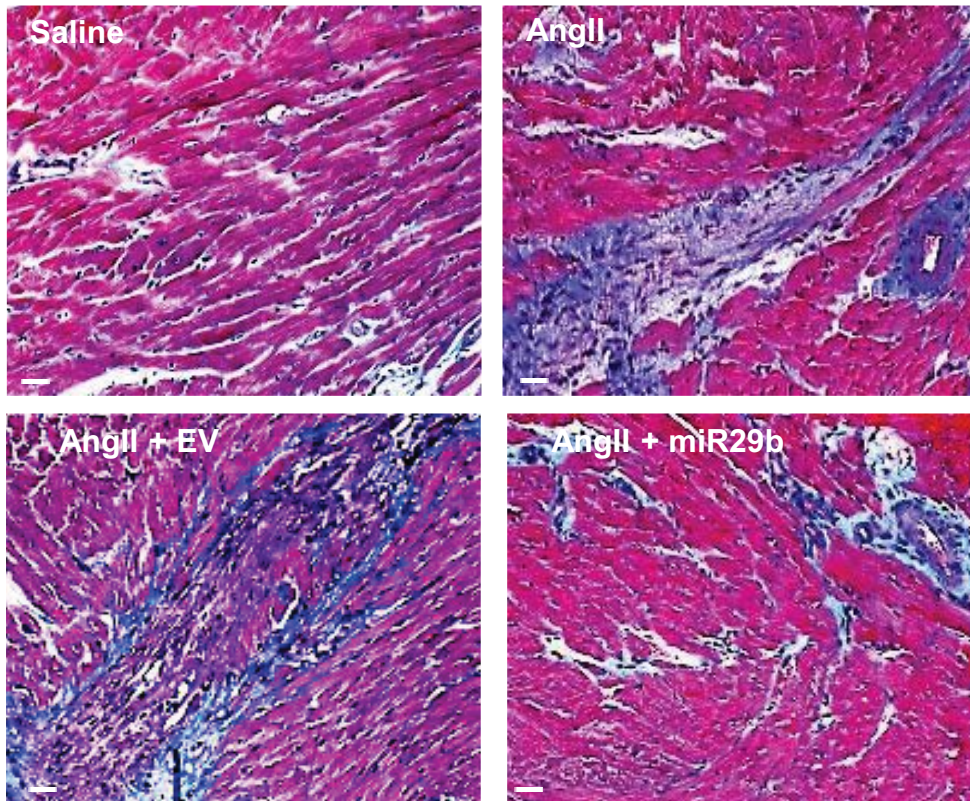

**Figure S2. Over-expression of miR-29b inhibits AngII-induced cardiac fibrosis without effect on the blood pressure at day 14.** (a) Systolic blood pressure. (b) Masson trichrome staining, showing green fibrotic tissues within myocardium. Data represent mean  $\pm$  SEM for six mice. \*\*\*  $P < 0.001$  compared with baseline at day 0. Scale bar, 50  $\mu$ M.

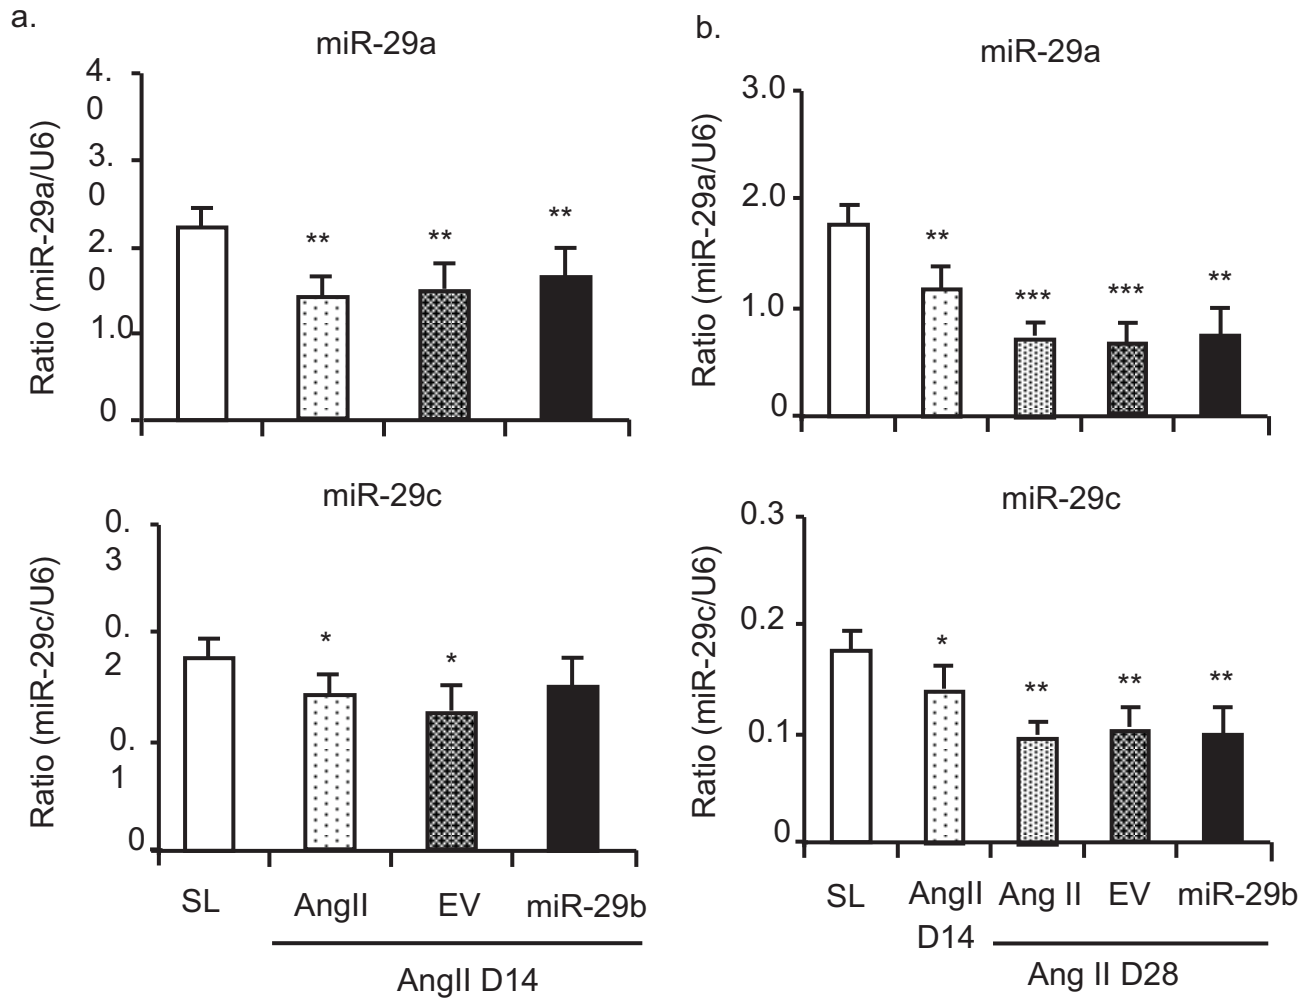

**Figure S3. Effect of AngII and overexpression of pre-miR-29b on miR-29a and miR-29c expression in the hypertensive heart.** (a) Effect of overexpression of pre-miR-29b on AngII-induced downregulation of miR-29a and miR-29c in a mouse model of hypertension at day 14. (b) Effect of overexpression of pre-miR-29b on AngII-induced downregulation of miR-29a and miR-29c in a mouse model of hypertension at day 28. Note that chronic AngII infusion downregulates miR-29a and miR-29c expression in the hypertensive heart, which is not altered by overexpression of pre-miR-29b. Each bar represents mean  $\pm$  SEM for 6 animals. \* $p < 0.05$ , \*\* $p < 0.01$ , \*\*\* $P < 0.001$  when compared with the saline-treated mice. EV, empty vector control.



### a. Systolic blood pressure

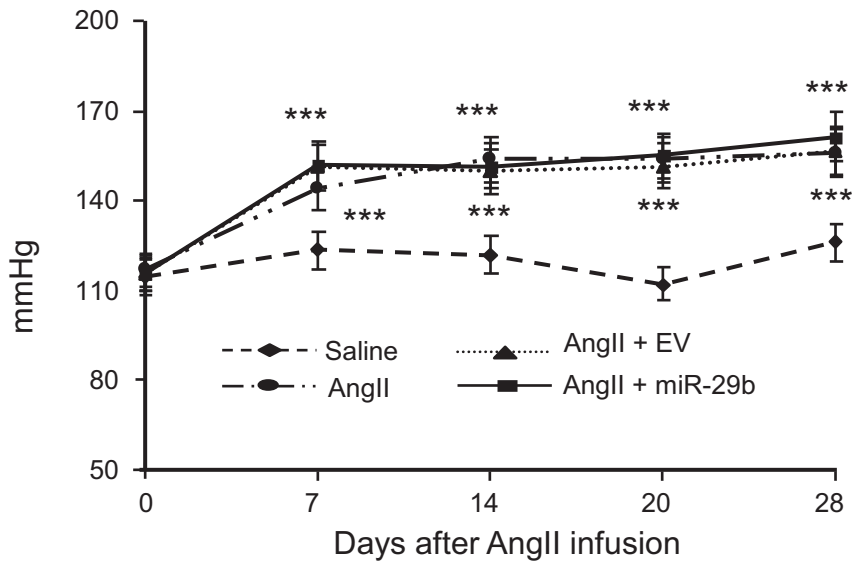

### b. Masson's trichrome

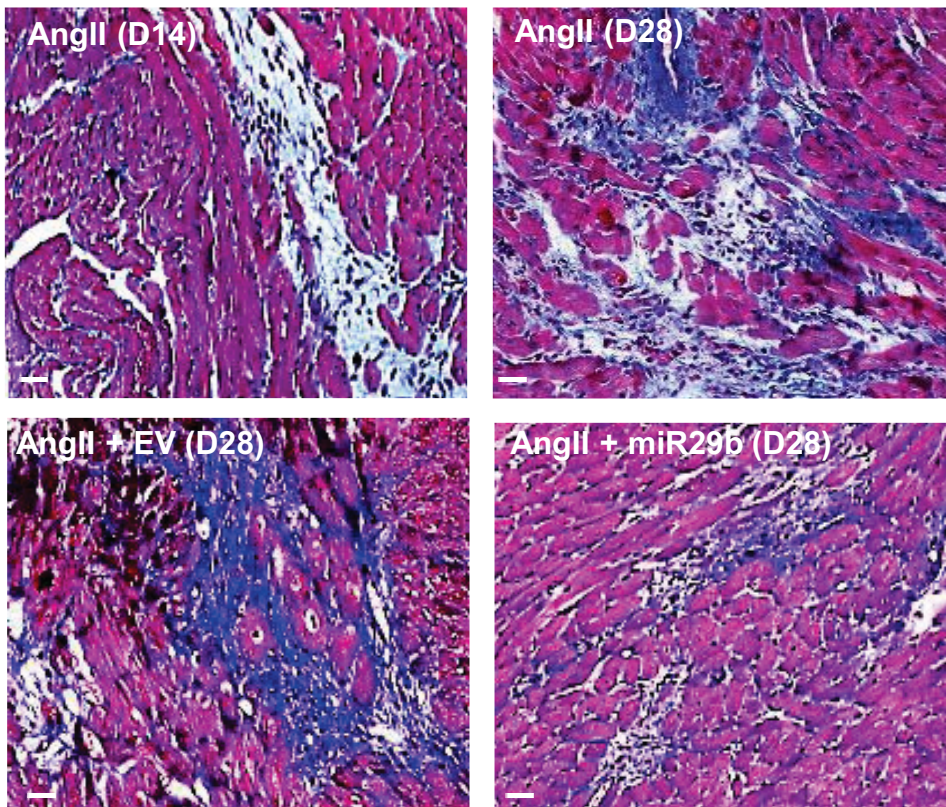

**Figure S4. Therapeutic effect of miR-29b on the established hypertensive heart disease over days 14-28 after AngII infusion.** (a) Systolic blood pressure. (b) Masson's trichrome staining shows that miR-29b treatment at day 14 after AngII infusion blocks progressive cardiac fibrosis. Data represent the mean  $\pm$  SEM for six mice. \*\*\*  $P < 0.001$  compared with baseline at day 0. Scale bar, 50  $\mu$ M.

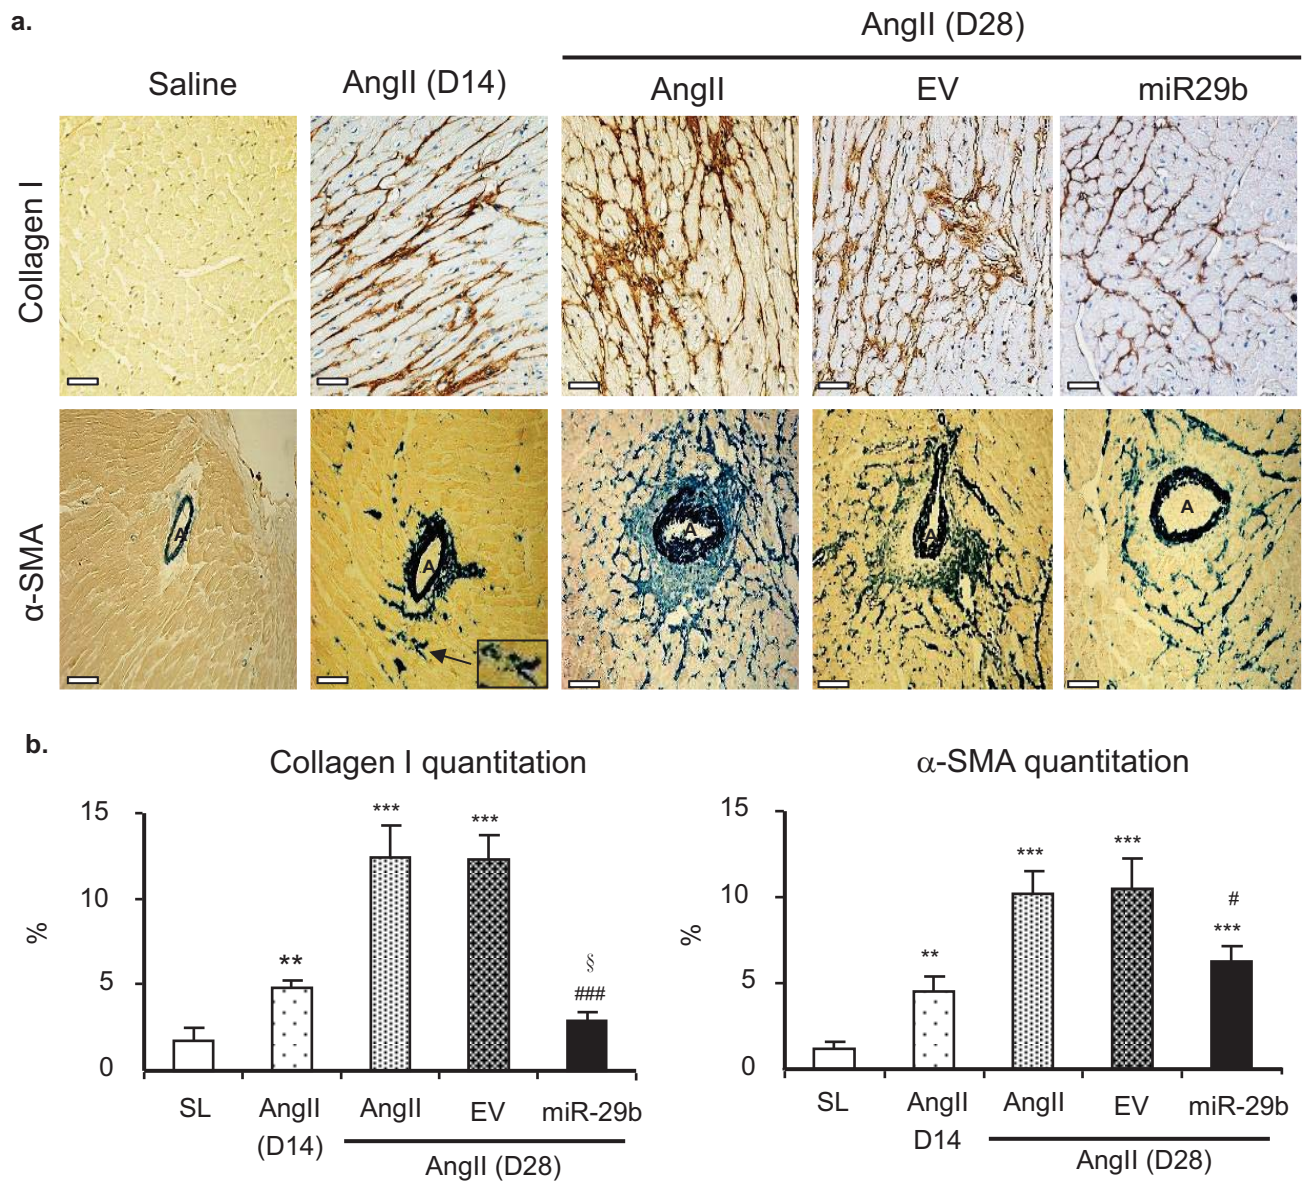

**Figure S5 Therapeutic effect of miR-29b on cardiac collagen I and  $\alpha$ -SMA<sup>+</sup> myofibroblast accumulation in established hypertensive cardiac disease at day 28 after AngII infusion.**

(a) Immunohistochemical analysis of collagen I (Col.I) and  $\alpha$ -SMA<sup>+</sup> myofibroblast accumulation. Note that  $\alpha$ -SMA<sup>+</sup> myofibroblasts are illustrated in the insert. (b) Quantitative analysis of collagen I and  $\alpha$ -SMA<sup>+</sup> myofibroblast accumulation. Each bar represents mean  $\pm$  SEM for six mice. \*\*  $P < 0.01$ , \*\*\*  $P < 0.001$  compared with saline (SL); #  $P < 0.05$ , ###  $P < 0.001$  compared with empty vector-treated (EV); §  $P < 0.05$  compared with day 14 disease animals before miR-29b treatment. A, arterioles. Scale bar, 100  $\mu$ M.



**a. Inhibitory effect of miR-29b on TGF- $\beta$ /Smad signaling at day 14 after AngII infusion**

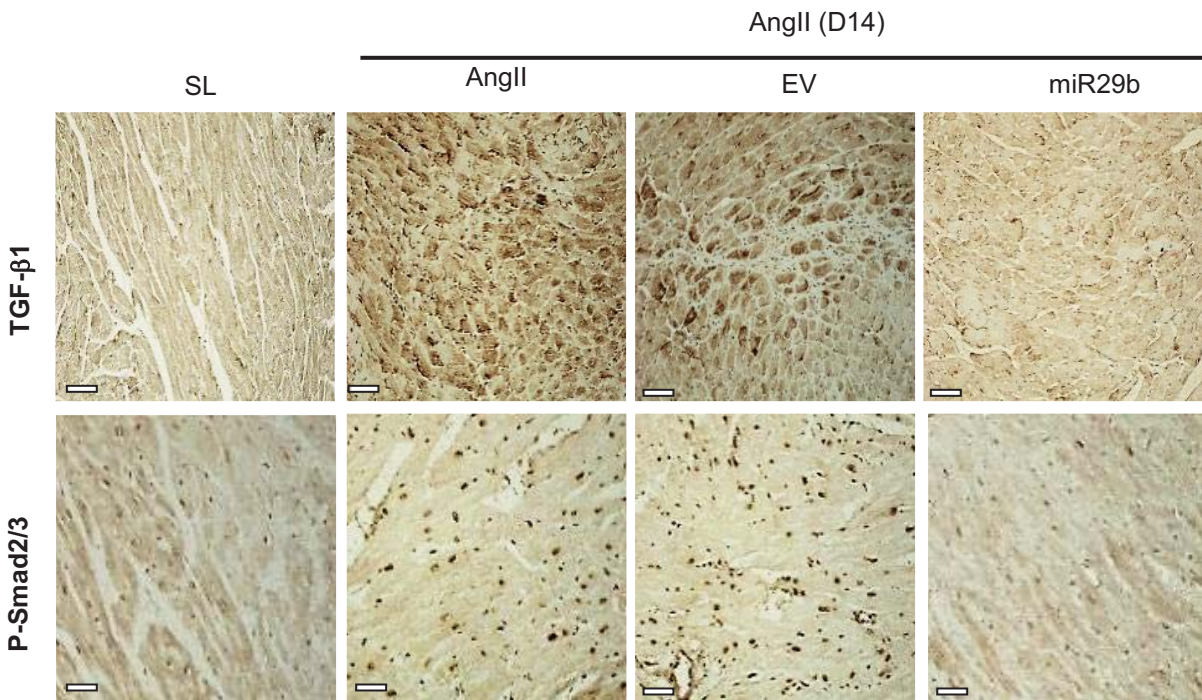

**b. Therapeutic effect of miR-29b on TGF- $\beta$ /Smad signaling at day 28 after AngII infusion**

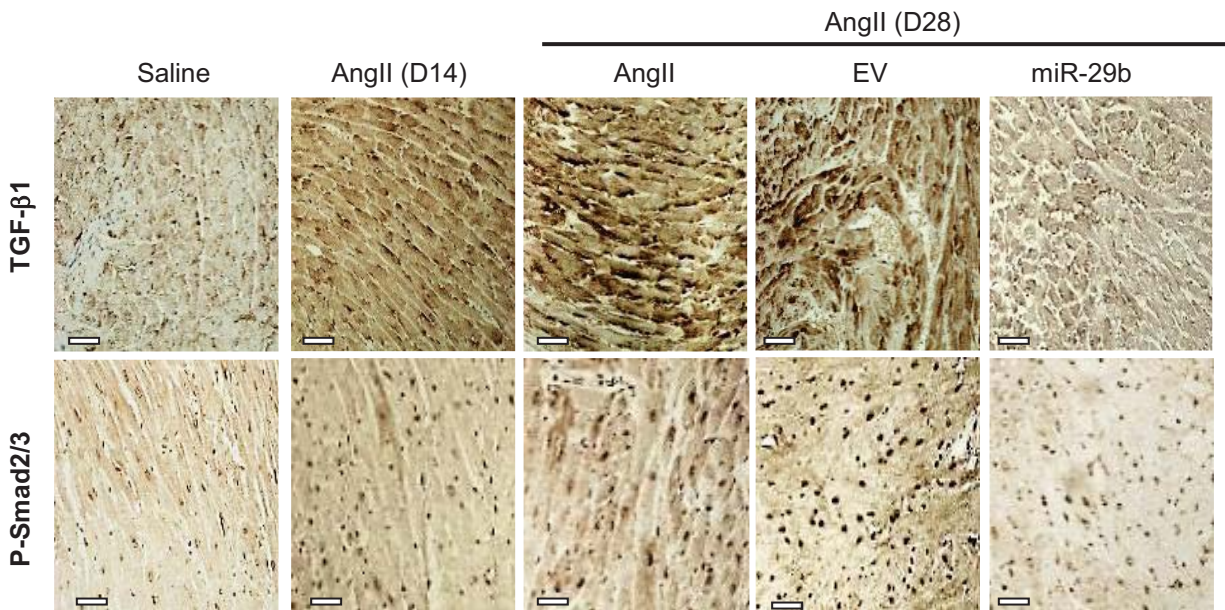

**Figure S6. miR-29b treatment inhibits AngII-induced activation of TGF- $\beta$ /Smad signaling in hypertensive cardiac disease.** (a) Effect of miR-29b treatment over days 0-14 on TGF- $\beta$ 1 expression and phospho-Smad2/3 nuclear location in AngII-induced hypertensive heart. (b) Effect of miR-29b treatment over days 14-28 on TGF- $\beta$ 1 expression and phospho-Smad2/3 nuclear location in AngII-induced hypertensive heart. Data represent for groups of 6 mice. Scale bar, 50  $\mu$ M.



**a. Effect of miR-29b on phosphorylation of ERK1/2 at day 14**

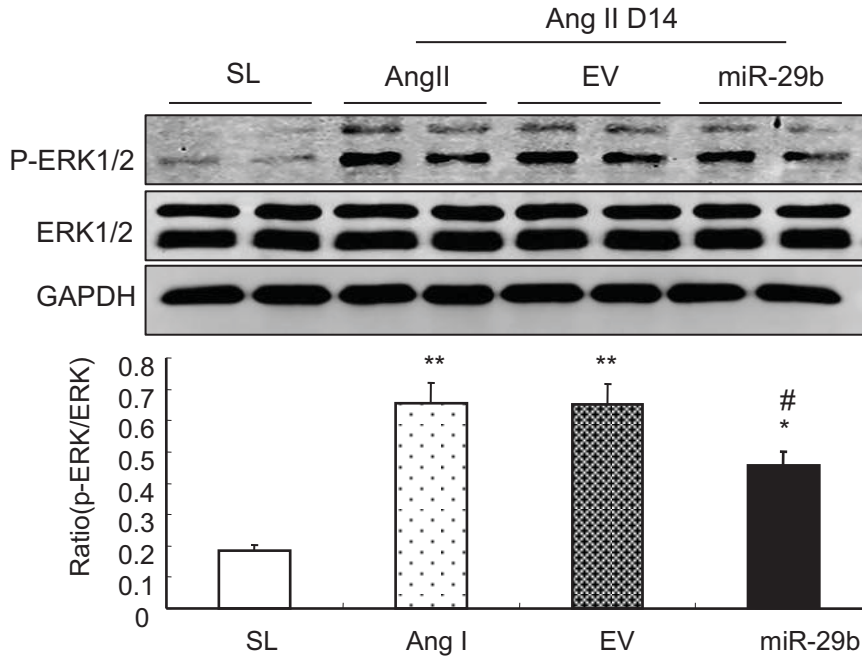

**b. Effect of miR-29b on phosphorylation of ERK1/2 at day 28**

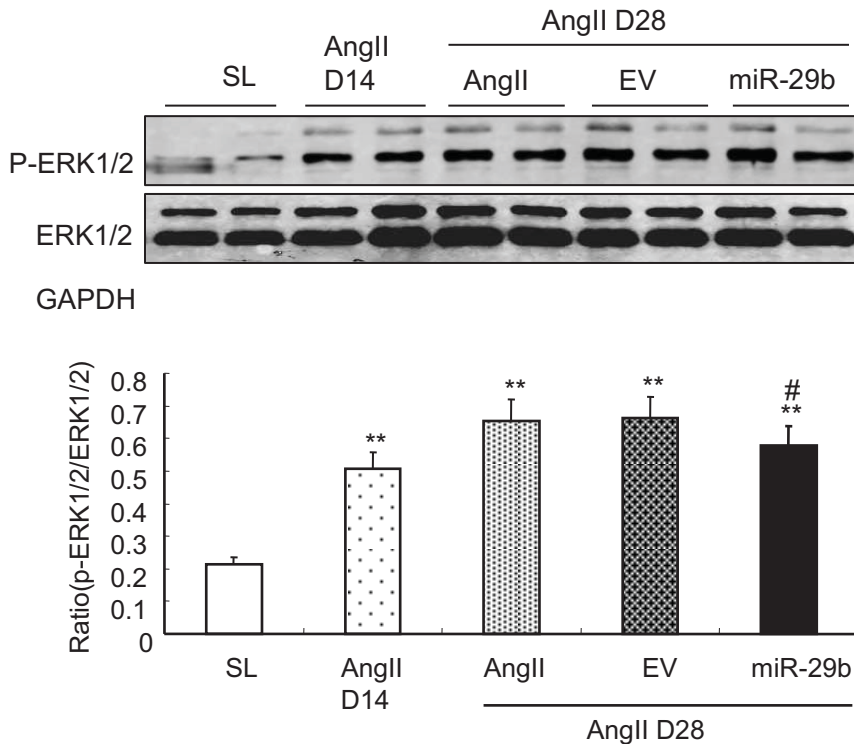

**Figure S7. Effect of overexpression of miR-29b on phosphorylation of ERK1/2 in Ang II-induced hypertensive heart.**

(a) miR-29b treatment from day 0 to day 14 with continuous AngII infusion. (b) miR-29b treatment in the established hypertensive heart disease from day 14 to day 28 with continuous AngII infusion. Each bar represents mean  $\pm$  SEM for six mice. \*  $P < 0.05$ , \*\*  $P < 0.01$  compared with saline (SL); #  $P < 0.05$  compared with empty vector-treated (EV).

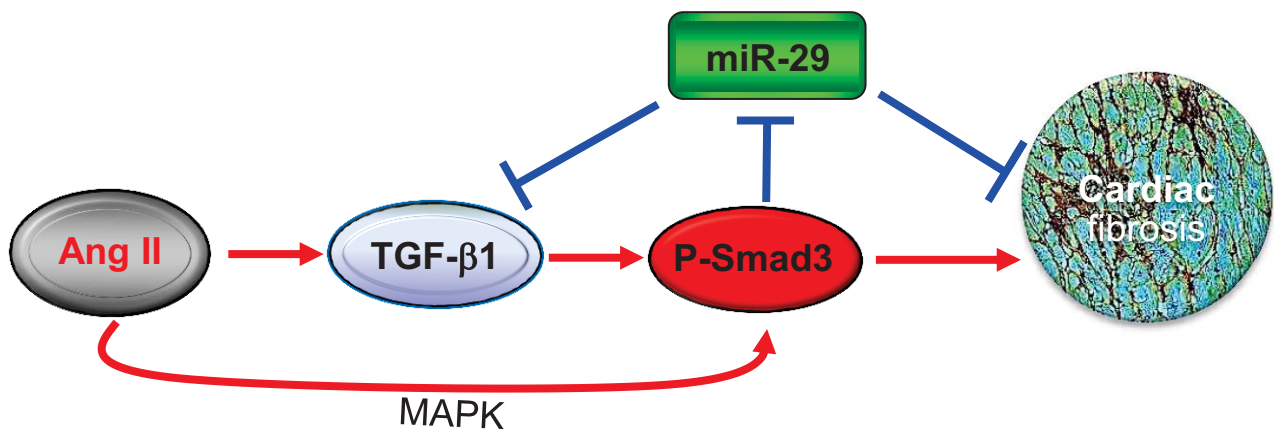

**Figure S8. The AngII-Smad3-miR-29 regulatory circuit in cardiac fibrosis.** AngII mediates cardiac fibrosis by activating Smad3 to down-regulate miR-29 expression via both TGF- $\beta$ -dependent and independent mechanisms. In contrast, over-expression of miR-29 can inhibit AngII-induced cardiac fibrosis by directly targeting the collagen matrix synthesis and indirectly by suppressing TGF- $\beta$ /Smad3 signaling.

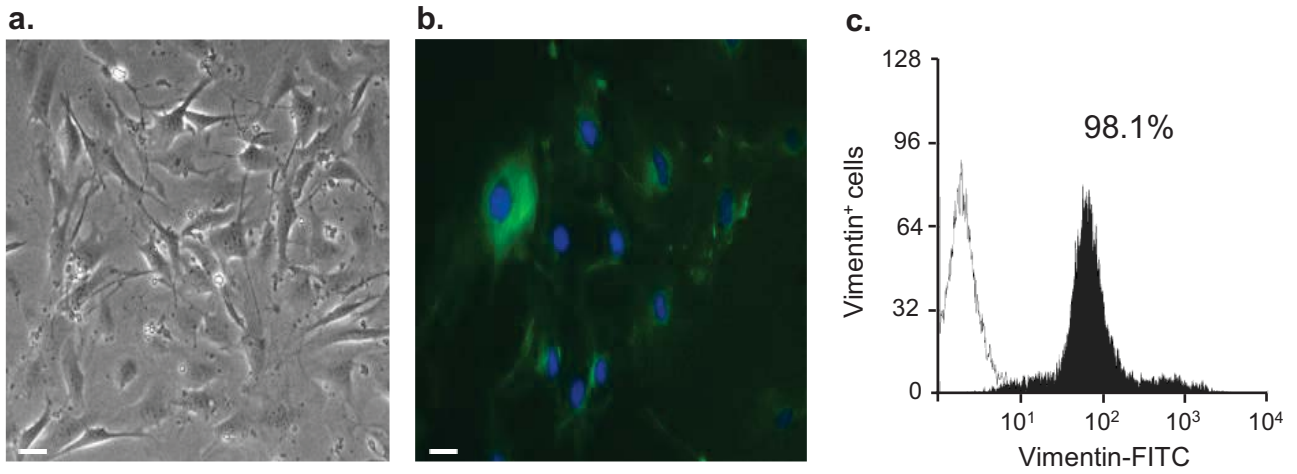

**Figure S9. Characterization of primary culture of cardiac fibroblasts (CFs).** (a) Morphology; (b) vimentin expression detected by immunofluorescence; (c) vimentin expression detected by flow cytometry. Data represent 4 independent experiments. Scale bar, 20  $\mu$ M.
